# Supplementary material
Source: Springer Nature journal article supplement (https://www.springermedizin.de/resource/supplementary/12913_2013_3133_MOESM2_ESM.pdf/9532448)

| Days of Filgrastim Prophylaxis | Unadjusted Odds Ratio | Adjusted Odds Ratio | 95% CI      |             |
|--------------------------------|-----------------------|---------------------|-------------|-------------|
|                                |                       |                     | Lower Limit | Upper Limit |

|                                |      |      |      |      |
|--------------------------------|------|------|------|------|
| 1-3 (n=8,371) vs >=7 (n=2,226) | 1.63 | 2.35 | 1.64 | 3.36 |
|--------------------------------|------|------|------|------|

|                                |      |      |      |      |
|--------------------------------|------|------|------|------|
| 4-6 (n=3,691) vs >=7 (n=2,226) | 1.51 | 1.93 | 1.31 | 2.83 |
|--------------------------------|------|------|------|------|

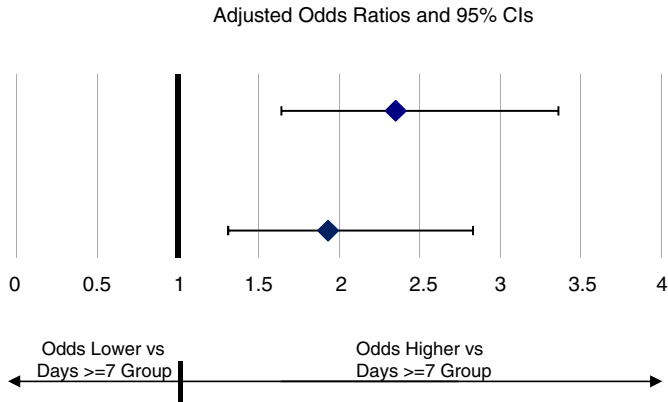

Supplement: MOESM2 [file 9532448]
